# Supplementary material for: A novel lily anther-specific gene encodes adhesin-like proteins associated with exine formation during anther development
Source: PubMed Central journal article supplement (PMC3991738; doi:10.1093/jxb/eru051), 2014-03-03
Supplement: supp_eru051_jexbot107532_file001.pdf [file supp_eru051_jexbot107532_file001.pdf]

**A novel lily anther-specific gene encodes adhesin-like proteins associated with exine formation during anther development.** *Ming-Che Liu, Cheng-Shou Yang, Fang-Ling Yeh, Chi-Hsuan Wei, Wann-Neng Jane, Mei-Chu Chung and Co-Shine Wang*

**SUPPLEMENTARY DATA**

|       |                                                                              |     |
|-------|------------------------------------------------------------------------------|-----|
| 1271a | ACGCGGGGATCTGCGTCTGTGAGGAATCAGCATCTACAAAAGATCATCTGAG                         | 51  |
| 1271b | .....                                                                        | 51  |
| 1271a | <b>ATG</b> GCGAAACTCAGCTTCTGCGCTATCTTTTGGCTCTCGCCGTA <b>ACT</b> GCGGCAGCATTG | 111 |
| 1271b | .....                                                                        | 111 |
| 1271a | M A K L S F C A I F L A L A V T A A A L                                      | 20  |
| 1271b | .....                                                                        | 20  |
| 1271a | CTTTCGGGCCACCATGCACAGCCGATAACAGAATGCCACCCCAAGTTGATGGGCCATTGC                 | 171 |
| 1271b | .....                                                                        | 171 |
| 1271a | L S G H H A Q P I T E C H P K L M G H C                                      | 40  |
| 1271b | .....                                                                        | 40  |
| 1271a | ACAA---GAAACTCATCGTCCCAATTACATGCTGCTTCTGAACCAATTAAGCCGCTGCT                  | 228 |
| 1271b | .....CAG.....                                                                | 231 |
| 1271a | T R - <b>N S S S</b> Q L H A A S E P I K P <b>S A</b>                        | 59  |
| 1271b | .....T G.....                                                                | 60  |
| 1271a | AAGTCTATATGTCTGCACCAACCCAGTTACATGCTGTTTCTGAACCTGTGAAGCCATCT                  | 288 |
| 1271b | .....                                                                        | 291 |
| 1271a | <b>K</b> S Y M S A P T Q L H A V S E P V K P <b>S</b>                        | 79  |
| 1271b | .....                                                                        | 80  |
| 1271a | GCTAAGTCTATATGTCTGCAAAATTACATGCTGTCTCTGAATCAGTAAAGCCATCTGCT                  | 348 |
| 1271b | .....                                                                        | 351 |
| 1271a | <b>A K</b> S Y M <b>S A K</b> L H A V S E <b>S V K</b> P <b>S A</b>          | 99  |
| 1271b | .....                                                                        | 100 |
| 1271a | AAGTCTTATATGTCTGCACCGCTGAATTGCATCTTGCCTCTGAACCGATGAAGCCGTCT                  | 408 |
| 1271b | .....                                                                        | 411 |
| 1271a | <b>K</b> S Y M S A P P E L H L A S E P M K P <b>S</b>                        | 119 |
| 1271b | .....                                                                        | 120 |
| 1271a | GCTAAGTCTTATATGTATGCACCACCCAAATTACATGCTGCCTCTGAAGCGGTGAAACCG                 | 468 |
| 1271b | .....                                                                        | 471 |
| 1271a | <b>A K</b> S Y M Y A P P K L H A A S E A V K P                               | 139 |
| 1271b | .....                                                                        | 140 |
| 1271a | TCTGTAAATCCTATATGTTGTATCACCCCAATTACATGCTGCCTCTGAACAGTGAAG                    | 528 |
| 1271b | .....                                                                        | 531 |
| 1271a | <b>S A K</b> S Y M F V S P Q L H A A S E P V K                               | 159 |
| 1271b | .....                                                                        | 160 |
| 1271a | CCGTCTGCTAAGTCTATATGTCCGCACAATTACATGTTGCCGCTGAACCAATAAAGCCG                  | 588 |
| 1271b | .....                                                                        | 591 |
| 1271a | P <b>S A K</b> S Y M S A Q L H V A A E P I K P                               | 179 |
| 1271b | .....                                                                        | 180 |
| 1271a | TCTACTAAATCCTATATGTTGTCTGTTGAGTCTATATGTCTGGAGTGCCCCAATTACAT                  | 648 |
| 1271b | .....                                                                        | 651 |
| 1271a | <b>S T K</b> S Y M L S V E S Y M S G V P Q L H                               | 199 |
| 1271b | .....                                                                        | 200 |
| 1271a | GAGGCCTCTGAACAGTGAATTCTGCTAAACCTATATATCTGCACCACACTCCGAGACT                   | 708 |
| 1271b | .....                                                                        | 711 |
| 1271a | E A S E P V N <b>S A K</b> P Y I S A P H S E T                               | 219 |
| 1271b | .....                                                                        | 220 |
| 1271a | CCCTTAAAAGTTGGAGTT <b>TGA</b> CAAGGTAAACCTACAAAAAGAATCGTGCCAATGTTATGT        | 768 |
| 1271b | .....                                                                        | 737 |
| 1271a | P L K V G V *                                                                | 225 |
| 1271b | .....                                                                        | 226 |
| 1271a | TTTT <b>CGGTGGTTACTGTTTTTCTATCTCTG</b> TGTTTCCAGGCTATATAGAATTTGGT <b>GC</b>  | 828 |
| 1271b | .....                                                                        | 755 |
| 1271a | <b>AGTAGCTTGGGGTGGAAATAATGGCTG</b> CATGGAAATATCTATATTAATGGAAAAATAATGC        | 888 |
| 1271b | .....                                                                        | 815 |
| 1271a | ATTATCGGATGTTAAGGAATGCTAATGTTATCATATACTATGGTGT <b>AATAAA</b> CAATTATG        | 948 |
| 1271b | .....                                                                        | 875 |
| 1271a | GAATCAAAAAAGTTTGTGTAT                                                        | 970 |
| 1271b | .....                                                                        | 897 |

**Supplementary Fig. S1.** Nucleotide and predicted amino acid sequences of *LLA1271* cDNA clones. Bold letters in the nucleotide sequence indicate the start and stop codons and the polyadenylation signal. A vertical arrow indicates the cut site of a signal peptide of LLA1271 proteins in the N-terminus. The underlined sequence indicates the synthetic peptide used for the production of antiserum. The box indicates the putative N-glycosylation (N-X-S/T) and phosphorylation (S/T-X-K/R) sites. 3'-primer A and B used for 5'-RACE are also indicated. A dash in the sequence indicates a gap introduced in order to maintain good alignment. Identities are represented by dots.

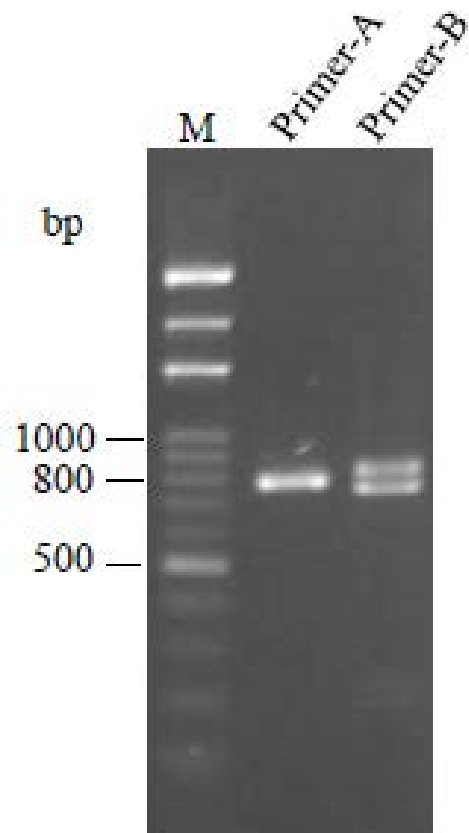

**Supplementary Fig. S2.** Identification of two forms of *LLA1271*. 5'-RACE PCR was performed with primers A and B, respectively. The PCR products were fractionated by 1.5% agarose gel and stained with EtBr. The 1 kb ladder markers (M) are indicated at the left.

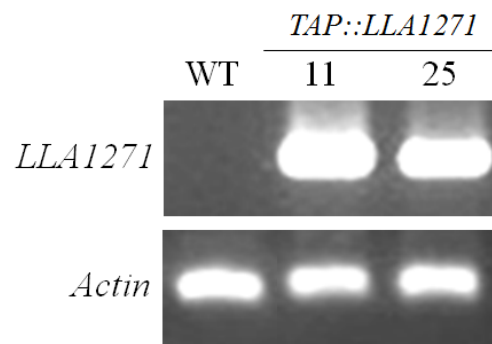

**Supplementary Fig. S3.** RT-PCR analysis of *TAP::LLA1271* transgenic lines. RT-PCR was performed on total RNA (1  $\mu$ g/line) isolated from five week-old inflorescence of wild-type and the two *TAP::LLA1271* transgenic lines 11 and 25. The fragment of *LLA1271* was amplified using a pair of specific primers to *LLA1271*. The *actin* gene was used as a quantitative control.

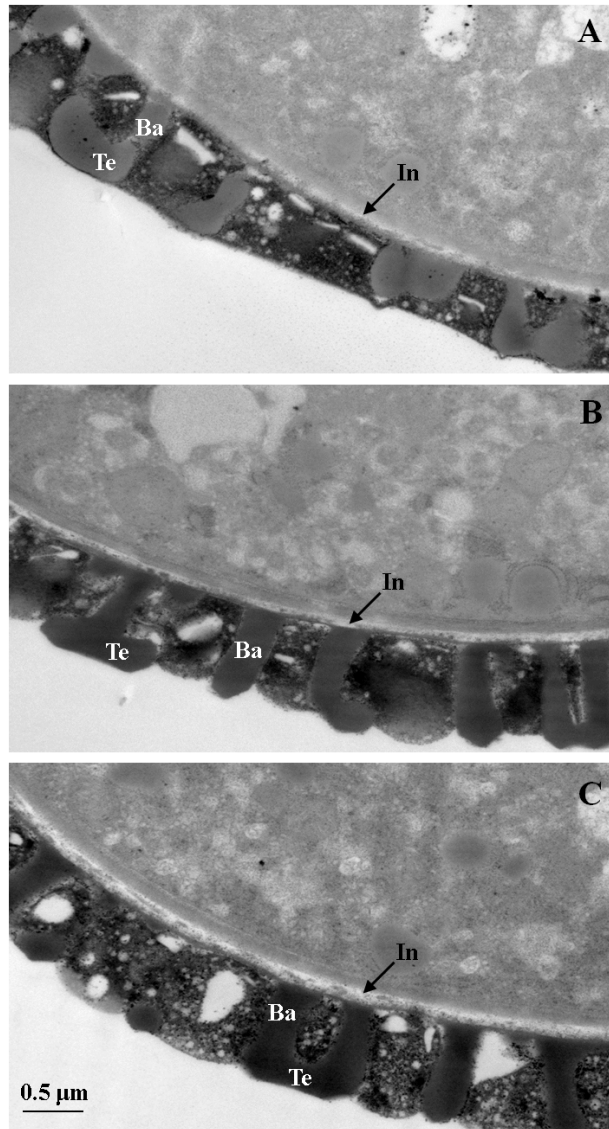

**Supplementary Fig. S4.** Transmission electron micrographs of *TAP::LLA1271* pollen grains. Micrographs of the pollen wall regions of the two *TAP::LLA1271* transgenic lines 11 (B) and 25 (C) were compared with that of wild-type pollen wall (A). Ba, Bacula; In, intine; Te, tectum.
